# Supplementary material for: Alkalinity of Neutrophil Phagocytic Vacuoles Is Modulated by HVCN1 and Has Consequences for Myeloperoxidase Activity
Source: PubMed Central journal article supplement (PMC4401748; doi:10.1371/journal.pone.0125906), 2015-04-17

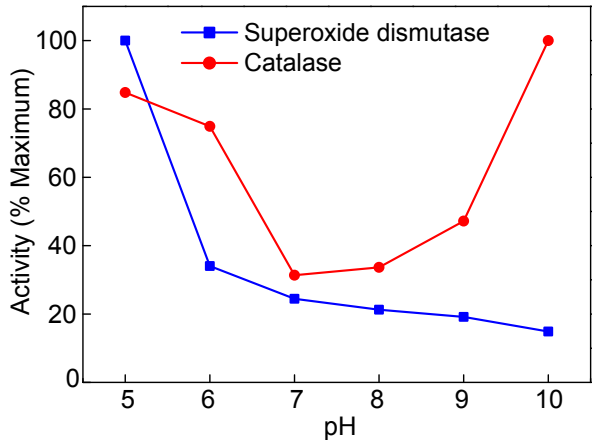

Supplement: pone.0125906.s005.pdf [file pone.0125906.s005.pdf]
